1 Rotten-skin disease significantly changed giant spiny frog(*Paa spinosa*) gut

2 microbiota

3 Tuoyu He<sup>1</sup>、 Yun Jiang<sup>1</sup>、 Pengpeng Wang<sup>1,3</sup>、 Jianguo Xiang<sup>1\*</sup>、 Wangcheng Pan<sup>2</sup>

4

5 <sup>1</sup> College of Animal Science and Technology, Hunan Agricultural University, Changsha,

6 China

7 <sup>2</sup> Changde Dabeinong Ltd, Changde, China

8 <sup>3</sup> Hunan Fisheries Science Institute, Changsha, China

9

10

11 Running title: Gut microbiota about rotten-skin disease

12

13 \* Correspondence author: jianguo Xiang, College of Animal Science and Technology,

14 Hunan Agricultural University, Changsha, 410125,China.e-mail: jgxianghau@163.com;

15

16

17

18

19

20

21

22 **Abstract:** The composition and abundance of gut microbiota is essential for host health

23 and immunity. Gut microbiota is symbiotic with the host, so changes in the host diet,

24 development, and health will lead to changes in the gut microbiota. Conversely, changes  
25 in the gut microbiota also affect the host conditions. In this experiment, 16S rRNA high-  
26 throughput sequencing was used to compare the gut microbiota composition of 5  
27 healthy *Paa spinosa* and 6 *P. spinosa* with rotten-skin disease. Results: the gut  
28 microbiota composition was significant difference between diseased *P. spinosa* and the  
29 healthy *P. spinosa*; LEfSe analysis showed that the relative abundance of  
30 *Methanocorpusculum*, *Parabacteroides*, *AF12*, *PW3*, *Epulopiscium*, and *Oscillospira*  
31 were significantly higher in the diseased *P. spinosa*, while the relative abundance of  
32 *Serratia*, *Eubacterium*, *Citrobacter*, and *Morganella* were significantly lower.  
33 Conclusion: Rotten-skin disease changed *P. spinosa* gut microbiota significantly; The  
34 relative abundance of *Epulopiscium* and *Oscillospira* might be related to the health  
35 conditions of the host skin and gallbladder; The relative abundance of *Serratia* and  
36 *Eubacterium* might be important for maintaining the gut microbiota ecosystem.

37

38

39

40

41

42 **Keywords:** microbiota structure; gut microbiota; rotten-skin disease; *Paa spinosa*;  
43 high-throughput sequencing

44 **Introduction**

45 The giant spiny frog (*Paa spinosa*) is a large edible frog distributed in the

46 mountains of China and Vietnam (1). It is favored by people for its great economic and  
47 medicinal value (2). In recent years, due to the increase of market demand and the  
48 destruction of habitats, the wild *P. spinosa* have been declined sharply. The Chinese  
49 Red Animal List has listed *P. spinosa* as a “vulnerable” species(3) (4). The artificial  
50 breeding has provided an effective way to meet market demand and protect wild *P.*  
51 *spinosa*. However, frequent disease problems seriously restrict the development of the  
52 *P. spinosa* industry (1) (5).

53 The rotten-skin disease is a common disease of *P. spinosa*, which is characterized  
54 by a dull epidermis and white spots appearing at the beginning, and then the epidermis  
55 falls off and begins to rot until the bone is exposed(6). Many pathogens cause rotten-  
56 skin disease, such as *Proteus mirabilis* and *Yersinia kristensenii*(6). Some diseased  
57 frogs will not die immediately, but growth is affected (7), some pathogens not only  
58 cause diseased frogs to show signs of rot but also cause a large number of deaths, such  
59 as *Chytridiomycosis*. The diversity of pathogens of rotten-skin disease bring difficulties  
60 to routine methods of preventing the disease, a new method is needed immediately.

61 Animal gut microbial communities as host “microbial organs” play an important  
62 role in host immunity and health, such as promoting the absorption of nutrients(8) (9)  
63 (10), impeding pathogens colonization in the gut (11) and regulating host immunity to  
64 maintain host health. Gut microbiota is symbiotic with the host, so changes in the host  
65 diet, development, and health can lead to changes in the gut microbiota (12)(13)(14).  
66 Conversely, changes in the gut microbiota also affect the host conditions. The normal  
67 microbiota composition is the guarantee for maintaining the physiological function of

68 the host (15). When the physiological function of the host is abnormal (such as the  
69 disease involving), the gut microbiota composition will change as well(16). In recent  
70 years, a new understanding of aquatic animal diseases has been gained by comparing  
71 the gut microbiota of diseased aquatic animals with healthy ones (Table 1). So we  
72 hypothesized that gut microbiota changed significantly between the healthy *P. spinosa*  
73 and the rotten-skin diseased *P. spinosa*. And comparing the composition of gut  
74 microbiota of healthy *P. spinosa* and the rotten-skin diseased *P. spinosa* we will know  
75 the microbiota change, which may be vital to discover the antagonistic bacteria of *P.*  
76 *spinosa* rotten-skin disease and explore new methods to prevent and control rotten-skin  
77 disease.

78 In this paper, the 16S rRNA amplicon high-throughput sequencing technology was  
79 used to investigate the effects of rotten-skin disease on gut microbiota composition in  
80 *P. spinosa*. The potential probiotics and antagonistic bacteria were screened out in the  
81 healthy *P. spinosa* through comparing the composition of gut microbiota between  
82 healthy and diseased *P. spinosa*, and expected to enrich the theories about regulating  
83 gut microbiota structure by using microbial ways and realizing the microecological  
84 prevention of rotten-skin disease in *P. spinosa*.

85

## 86 **Materials and methods**

### 87 **Sample Collection**

88 All animal experiments were conducted in accordance with the recommendations in the  
89 Guide for the Care and Use of Laboratory Animals of the National Institute of

90 Health(NIH). The experimental animals were approved by the experimental animal  
91 ethic committee of Hunan Agriculture University. All samples were collected from  
92 Shimen County, Hunan Province Weixin Town *P.spinosa* farm (110°29'-111°33'E,  
93 29°16'-30°08 N). There were 11 *P.spinosa* in the experiment, including 5 Healthy  
94 *P.spinosa* (H) and 6 diseased *P.spinosa* (D). The frog was anesthetized and dissected  
95 under sterile conditions, collected gut contents, transferred to 2 ml sterile EP tubes and  
96 stored at -80 ° C, used for subsequent DNA extraction.

97

#### 98 **DNA extraction and high-throughput sequencing**

99 The gut microbiota DNA was extracted using a DNeasy PowerSoil Kit (QIAGEN,  
100 Germany). The V4-V5 hypervariable region of the prokaryotic 16S rRNA gene was  
101 amplified using the universal primer pair 515F and 909R, with a 12-nt sample-specific  
102 barcode sequence, including at the 5'-end of the 515F to distinguish samples (17) (18).  
103 PCR was performed, and amplicons were sequenced using a MiSeq system at  
104 Guangdong Meilikang Bio-Science, Ltd. (China), as described previously (1).  
105 The raw sequences were merged using FLASH-1.2.8 software and processed using the  
106 QIIME pipeline 1.9.0 as described previously(1)(19). Chimeric sequences were  
107 identified and removed using the Uchime algorithm and the no-chimeric sequences  
108 were clustered into OTUs at 97% identity using UPARSE software (20) (21). The RDP  
109 classifier was used to detect the taxonomic assignments of each OTU (22).

110 The merged sequences were submitted to the NCBI SRA database (accession number  
111 SRR10765290-SRR10765300 ).

#### 112 **Data Analysis**

113 The results for each parameter were presented as the mean  $\pm$  standard error for each  
114 group. Principal coordinate analysis (PCoA) based on unweighted Unifrac distance was  
115 applied to evaluate the differences in different groups. Principal component analysis  
116 (PCA) was performed by R vegan package. Non-parametric ANOVA (PERMANOVA)  
117 was performed using the R vegan package(23) to analyze the significance of differences  
118 between groups; Welch's T-test(STAMP) was performed to analyze significantly  
119 different phylum in gut microbiota between groups; Prism 6 was used for box plot  
120 production; T tests was conducted by SPSS16.0 to analyze the significance of  
121 differences in diversity indicators; the p-value less than 0.05 were significant difference,  
122 p-value less than 0.01 were significant extremely.

123

## 124 **Results**

125 The skin of diseased *P. spinosa* had the white spot or large area of decay. After anatomy,  
126 there were obvious lesions in the liver and gallbladder. The liver blackened obviously.  
127 The gallbladder was enlarged or discolored. The symptoms of the diseased *P. spinosa*  
128 are shown in the picture (Fig. 1).

129 A total of 466,541 high-quality sequences were obtained from the 11 gut microbiota  
130 samples. To avoid the influence of sequencing depth, 25,520 sequences were randomly  
131 selected from each sample for further analysis, and 5,793 OTUs from 704 genera were  
132 identified. The results of gut microbiota diversity indicated that the diversity index,  
133 such as Chao1, Observed-species, PD-whole-tree, Shannon index, and Simpson index,  
134 in healthy *P. spinosa* were significantly lower than the diseased *P. spinosa*, but the

135 Good-coverage had no difference (Fig.2). Removing the unclassified sequences  
136 (<0.001%), 19 of the 56 phyla dominated the gut microbiota. *Bacteroides* and  
137 *Firmicutes* were the dominant microbiota in the gut of all samples (Fig. 3A), which is  
138 consistent with a previous study (1). Among them, the average relative abundance of  
139 *Bacteroides*, *Firmicutes*, *Proteobacteria*, *Tenericutes*, and *Euryarchaeota* was more  
140 than 1% in all samples (Fig. 3A). STAMP based on relative abundance of top 10 phyla  
141 in the gut microbiota showed that *Proteobacteria* was significantly higher in the healthy  
142 *P. spinosa*, while the relative abundance of *Euryarchaeota* and *Spirochaetes* were  
143 significantly lower (Fig. 3B).

144 PCA based on the relative abundance of all gut microbiota genera and PCoA based on  
145 the relative abundance of the all gut microbiota genera showed that there were  
146 significant differences in gut microbiota composition between diseased and healthy *P.*  
147 *spinosa* (PERMANOVA,  $F= 3.0464$ ,  $p = 0.008$ ) (Fig. 4A and 4B). Unweighted Pair-  
148 Group Method with Arithmetic means UPGMA analysis shown that microbiota  
149 composition were familiar between the groups (Fig. 4C).

150 Lefse analyzed the difference of gut microbiota at genus level showed that relative  
151 abundance of *Serratia*, *Eubacterium*, *Citrobacter*, and *Morganella* were significantly  
152 higher in healthy *P. spinosa*, while the relative abundance of *Methanocorpusculum*,  
153 *Parabacteroides*, *AF12*, *PW3*, *Epulopiscium*, and *Oscillospira* were significantly lower  
154 (Fig. 5).

## 155 **Discussion**

156 Recent researches have shown that gut microbiota has participated in various disease

157 processes through the gut-brain axis (24) (25), the gut-lung axis (26) (27) the gut-  
158 vascular axis(28, 29) , the gut-bone axis (30) (31),the gut-Hepatic axis (32) (33) and  
159 other axis (34). The concept of “core microbiota” indicated that the core microbiota in  
160 the gut of healthy hosts could maintain the stability of gut microbiota composition and  
161 function, and positively regulated the host through these axis to maintain host health  
162 (35). The gut microbiota function was destroyed because of the destruction of the core  
163 microbiota, and the host might become sick or aggravate the lesion (16). In this study,  
164 the gut microbiota of diseased and healthy *P. spinosa* was compared, and the results  
165 revealed significant differences in the gut microbiota composition of healthy and  
166 diseased *P. spinosa*. The composition of microbiota was destroyed because of pathogen  
167 invading.

168 Current researches on gut microbiota focused on gut microbiota diversity and gut  
169 microbiota composition. According to the diversity resistance hypothesis, the more  
170 diverse that the microbial community was and the more possible that the host  
171 resisted to pathogen invasion (36). Studies in the largemouth bronze gudgeon  
172 (*Coreius guichenoti*) (37), crucian Carp (*Carassius auratus*) (14), and ayu  
173 (*Plecoglossus altivelis*) (38) showed that the microbiota diversity was significantly  
174 higher in healthy samples. However, this study found that gut microbiota diversity was  
175 significantly higher in diseased *P. spinosa*. The results were consistent with the results  
176 of grass carp (*Ctenopharyngodon idellus*) (39). And found that the amino acid  
177 metabolism, carbohydrate metabolism, and immune-related pathway genes of diseased  
178 grass carp were more abundant through microbiota gene prediction (39). The increased



179 microbiota diversity in the gut of the diseased host may because the microbial  
180 homeostasis in the gut of the diseased host has not been broken immediately. To  
181 maintain the health of the host, the gut microbiota diversity was increased to protect  
182 against pathogen invasion. The results of this study and previous studies have shown  
183 that the use of gut microbiota diversity to assess host health is limited.

184 The relative abundance of *Methanocorpusculum*, *Parabacteroides*, *AF12*, *PW3*,  
185 *Epulopiscium*, and *Oscillospira* in the gut of rotten-skin *P.spinosa* were significantly  
186 higher than healthy *P. spinosa*. Although *Methanocorpusculum* is not a pathogen, it is  
187 abundant in diseased samples (40). It can effectively convert heavy metals or metalloids  
188 into more toxic derivatives than compounds, which was harmful to host health (41);  
189 *Parabacteroides goldsteinii* in *Parabacteroides* can cause bacteraemia ; Previously  
190 studied in the gut microbiota of wild and cultured *P. spinosa* found that the cultured *P.*  
191 *spinosa* with more potential pathogens had more *AF12* in the gut (1); Studies on human  
192 gallstones indicated that the relative abundance of *Oscillospira* was positive correlation  
193 with the gallstones (42, 43); The relative abundance of *Epulopiscium* was significantly  
194 increased in the gut of rotten-skin diseased *P. spinosa*, and also significantly increased  
195 in the feces of children with eczema(44). In summary, the gut microbiota that was  
196 significantly increased in the gut of rotten-skin disease *P. spinosa* was mostly  
197 opportunistic pathogen; *Oscillospira* and *Epulopiscium* were significantly increased in  
198 the gut of the diseased host when lesions occurred in the skin and gallbladder. It was  
199 speculated that these two species may be indicator microbiota in the pathogenesis of  
200 skin and gallbladder.

201 The relative abundance of *Serratia*, *Eubacterium*, *Citrobacter*, and *Morganella* in the  
202 gut of healthy *P. spinosa* was significantly higher than diseased *P. spinosa*. Some  
203 species in *Serratia* produced Prodigiosin and  $\beta$ -lactam antibiotic carbapenem to inhibit  
204 the growth of pathogens in the host, thereby inhibiting the disease (45, 46);  
205 *Bifidobacteria* and *Eubacterium hallii* promoted acetate, butyrate, propionate, and  
206 formate to form, potentially contributing to gut SCFA formation with potential benefits  
207 for the host and for microbiota colonization of the infant gut (47). *E. hallii* was also  
208 capable of metabolizing glycerol to 3-hydroxypropionaldehyde with antibacterial  
209 properties (48); The relative abundance of *Citrobacter* and *Morganella* in the gut of  
210 healthy *P. spinosa* was significantly higher than diseased *P. spinosa*, however  
211 *Citrobacter rodentium* and *Morganella morganii* are common opportunistic pathogen  
212 (49) (50). In summary, *Serratia* and *Eubacterium* might be the main gut microbiota in  
213 the healthy *P. spinosa* that maintained the health of *P. spinosa*; *Citrobacter* and  
214 *Morganella* in the gut of healthy *P. spinosa* were significantly increased without causing  
215 disease. It might be that non-pathogenic strains of *Citrobacter* and *Morganella*  
216 appeared in the gut of healthy frogs, or there were pathogenic strains in these two  
217 species, but due to the inhibition of beneficial microbiota in the gut of healthy hosts,  
218 the host still maintained a healthy state of gut microbiota homeostasis.

219

## 220 **Conclusion**

221 Rotten-skin disease significantly changed *P. spinosa* gut microbiota; the relative  
222 abundance of *Methanocorpusculum*, *Parabacteroides*, *AF12*, *PW3*, *Epulopiscium*, and

223 *Oscillospira* were significantly higher in the diseased *P. spinosa* , while the relative  
224 abundance of *Serratia*, *Eubacterium*, *Citrobacter*, and *Morganella* were significantly  
225 lower; The relative abundance of *Epulopiscium* and *Oscillospira* might be related to the  
226 healthy condition of the host skin and gallbladder; The relative abundance of *Serratia*  
227 and *Eubacterium* might be important for maintaining the gut microbiota ecosystem.

228

## 229 **Acknowledgements**

230

231 **Financial support:** This work was supported by Sichuan Provincial Department of  
232 Education Key Scientific Research Project 18ZA0443 and Xichang University PhD  
233 Project 2017BS009.

234 **Conflicts of interest:** All authors: No potential conflicts of interest.

235

236

237

238

239

240

241

242

## 243 **References**

244 1. Xiang J, He T, Wang P, Xie M, Xiang J, Ni J. 2018. Opportunistic pathogens are  
245 abundant in the gut of cultured giant spiny frog (*Paa spinosa*). *Aquaculture*

- 246 Research 49:2033-2041.
- 247 2. Zhao W, Li C, Zhang D, Wang R, Zheng Y, Zou H, Li W, Wu S, Wang G, Li M.  
248 2018. *Balantidium grimi* n. sp. (Ciliophora, Litostomatea), a new species  
249 inhabiting the rectum of the frog *Quasipaa spinosa* from Lishui, China. *Parasite*  
250 25:29.
- 251 3. Chan H-K, Shoemaker KT, Karraker NE. 2014. Demography of *Quasipaa* frogs  
252 in China reveals high vulnerability to widespread harvest pressure. *Biological*  
253 *Conservation* 170:3-9.
- 254 4. Dong BJ, Zhan ZG, Zheng RQ, Chen W, Min JJ. 2015. cDNA cloning and  
255 functional characterisation of four antimicrobial peptides from *Paa spinosa*. *Z*  
256 *Naturforsch C J Biosci* 70:251-6.
- 257 5. Long J, Xiang J, He T, Zhang N, Pan W. 2020. Gut microbiota differences  
258 during metamorphosis in sick and healthy giant spiny frogs (*Paa spinosa*)  
259 tadpoles. *Lett Appl Microbiol* 70:109-117.
- 260 6. Shu Xinhua Jin Xieli Xiao Keyu Chen Keyi. 1994. W Studies on the Pathogenic  
261 Bacteria of the Rotten Skin and Red leg Disease of the Bullfrog I Virulence and  
262 Biological Features of *Aeromonas hydrophila*. *Journal of Natural Science of*  
263 *Hunan Normal University*1994-5.
- 264 7. WU Ke-bang, DIAO Xiao-ping, HAN Xin-chou, NI Cheng-jie, WU Ying-hua.  
265 2003. Study on treating skin disease of Hainan frog with Chinese herbs complex  
266 agents. *Journal of Traditional Chinese Veterinary Medicine* 2003-5.
- 267 8. Hao YT, Wu SG, Xiong F, Tran NT, Jakovlic I, Zou H, Li WX, Wang GT. 2017.  
268 Succession and Fermentation Products of Grass Carp (*Ctenopharyngodon*  
269 *idellus*) Hindgut Microbiota in Response to an Extreme Dietary Shift. *Front*  
270 *Microbiol* 8:1585.
- 271 9. Nicholson JK, Holmes E, Wilson ID. 2005. Gut microorganisms, mammalian  
272 metabolism and personalized health care. *Nat Rev Microbiol* 3:431-8.
- 273 10. Leadbetter EA, Rifkin IR, Hohlbaum AM, Beaudette BC, Shlomchik MJ,  
274 Marshak-Rothstein A. 2002. Chromatin-IgG complexes activate B cells by dual  
275 engagement of IgM and Toll-like receptors. *Nature* 416(6881):603.

- 276 11. Ringo E, Jutfelt F, Kanapathippillai P, Bakken Y, Sundell K, Glette J, Mayhew  
277 TM, Myklebust R, Olsen RE. 2004. Damaging effect of the fish pathogen  
278 *Aeromonas salmonicida* ssp. *salmonicida* on intestinal enterocytes of Atlantic  
279 salmon (*Salmo salar* L.). *Cell Tissue Res* 318:305-11.
- 280 12. Li J, Ni J, Li J, Wang C, Li X, Wu S, Zhang T, Yu Y, Yan Q. 2014. Comparative  
281 study on gastrointestinal microbiota of eight fish species with different feeding  
282 habits. *J Appl Microbiol* 117:1750-60.
- 283 13. Ni J, Yan Q, Yu Y, Zhang T. 2014. Factors influencing the grass carp gut  
284 microbiome and its effect on metabolism. *FEMS Microbiol Ecol* 87:704-14.
- 285 14. Li X, Zhou L, Yu Y, Ni J, Xu W, Yan Q. 2017. Composition of Gut Microbiota  
286 in the Gibel Carp (*Carassius auratus gibelio*) Varies with Host Development.  
287 *Microb Ecol* 74:239-249.
- 288 15. Andoh A. 2016. Physiological Role of Gut Microbiota for Maintaining Human  
289 Health. *Digestion* 93:176-81.
- 290 16. Li T, Li H, Gatesoupe FJ, She R, Lin Q, Yan X, Li J, Li X. 2017. Bacterial  
291 Signatures of "Red-Operculum" Disease in the Gut of Crucian Carp (*Carassius*  
292 *auratus*). *Microb Ecol* 74:510-521.
- 293 17. Ni J, Li X, He Z, Xu M. 2017. A novel method to determine the minimum  
294 number of sequences required for reliable microbial community analysis. *J*  
295 *Microbiol Methods* 139:196-201.
- 296 18. Huang R, Li T, Ni J, Bai X, Gao Y, Li Y, Zhang P, Gong Y. 2018. Different Sex-  
297 Based Responses of Gut Microbiota During the Development of Hepatocellular  
298 Carcinoma in Liver-Specific *Tsc1*-Knockout Mice. *Front Microbiol* 9:1008.
- 299 19. Ni J, Huang R, Zhou H, Xu X, Li Y, Cao P, Zhong K, Ge M, Chen X, Hou B,  
300 Yu M, Peng B, Li Q, Zhang P, Gao Y. 2019. Analysis of the Relationship  
301 Between the Degree of Dysbiosis in Gut Microbiota and Prognosis at Different  
302 Stages of Primary Hepatocellular Carcinoma. *Front Microbiol* 10:1458.
- 303 20. Edgar RC. 2013. UPARSE: highly accurate OTU sequences from microbial  
304 amplicon reads. *Nat Methods* 10:996-8.
- 305 21. Edgar RC, Haas BJ, Clemente JC, Quince C, Knight R. 2011. UCHIME

- 306 improves sensitivity and speed of chimera detection. *Bioinformatics* 27:2194-  
307 200.
- 308 22. Wang Q, Garrity GM, Tiedje JM, Cole JR. 2007. Naive Bayesian classifier for  
309 rapid assignment of rRNA sequences into the new bacterial taxonomy. *Appl*  
310 *Environ Microbiol* 73:5261-7.
- 311 23. Dixon P.2003. VEGAN, a package of R functions for community ecology.  
312 *Journal of Vegetation Science* 14(6):927-930..
- 313 24. Baruch K, Schwartz M. 2016. Circulating Monocytes in between the Gut and  
314 the Mind. *Cell Stem Cell* 18:689-91.
- 315 25. Kennedy PJ, Cryan JF, Dinan TG, Clarke G. 2017. Kynurenine pathway  
316 metabolism and the microbiota-gut-brain axis. *Neuropharmacology* 112:399-  
317 412.
- 318 26. Budden KF, Gellatly SL, Wood DL, Cooper MA, Morrison M, Hugenholtz P,  
319 Hansbro PM. 2017. Emerging pathogenic links between microbiota and the gut-  
320 lung axis. *Nat Rev Microbiol* 15:55-63.
- 321 27. Shukla SD, Budden KF, Neal R, Hansbro PM. 2017. Microbiome effects on  
322 immunity, health and disease in the lung. *Clinical & Translational Immunology*  
323 6.
- 324 28. Zhu W, Gregory JC, Org E, Buffa JA, Gupta N, Wang Z, Li L, Fu X, Wu Y,  
325 Mehrabian M, Sartor RB, McIntyre TM, Silverstein RL, Tang WHW, DiDonato  
326 JA, Brown JM, Lusa AJ, Hazen SL. 2016. Gut Microbial Metabolite TMAO  
327 Enhances Platelet Hyperreactivity and Thrombosis Risk. *Cell* 165:111-124.
- 328 29. Li R, Yang J, Saffari A, Jacobs J, Baek KI, Hough G, Larauche MH, Ma J, Jen  
329 N, Moussaoui N, Zhou B, Kang H, Reddy S, Henning SM, Campen MJ, Pisegna  
330 J, Li Z, Fogelman AM, Sioutas C, Navab M, Hsiai TK. 2017. Ambient Ultrafine  
331 Particle Ingestion Alters Gut Microbiota in Association with Increased  
332 Atherogenic Lipid Metabolites. *Sci Rep* 7:42906.
- 333 30. Ohlsson C, Sjogren K. 2015. Effects of the gut microbiota on bone mass. *Trends*  
334 *Endocrinol Metab* 26:69-74.
- 335 31. Villa CR, Ward WE, Comelli EM. 2017. Gut microbiota-bone axis. *Crit Rev*

- 336 Food Sci Nutr 57:1664-1672.
- 337 32. Nicolas S, Blasco-Baque V, Fournel A, Gilleron J, Klopp P, Waget A, Ceppo F,  
338 Marlin A, Padmanabhan R, Iacovoni JS, Terce F, Cani PD, Tanti JF, Burcelin R,  
339 Knauf C, Cormont M, Serino M. 2017. Transfer of dysbiotic gut microbiota has  
340 beneficial effects on host liver metabolism. *Mol Syst Biol* 13:921.
- 341 33. Xue L, He J, Gao N, Lu X, Li M, Wu X, Liu Z, Jin Y, Liu J, Xu J, Geng Y. 2017.  
342 Probiotics may delay the progression of nonalcoholic fatty liver disease by  
343 restoring the gut microbiota structure and improving intestinal endotoxemia. *Sci*  
344 *Rep* 7:45176.
- 345 34. Feng Q, Chen WD, Wang YD. 2018. Gut Microbiota: An Integral Moderator in  
346 Health and Disease. *Front Microbiol* 9:151.
- 347 35. Yao Z, Yang K, Huang L, Huang X, Qiuqian L, Wang K, Zhang D. 2018.  
348 Disease outbreak accompanies the dispersive structure of shrimp gut bacterial  
349 community with a simple core microbiota. *AMB Express* 8:120.
- 350 36. Fargione JE, Tilman D. 2005. Diversity decreases invasion via both sampling  
351 and complementarity effects. *Ecology Letters* 8:604-611.
- 352 37. Li T, Long M, Ji C, Shen Z, Gatesoupe FJ, Zhang X, Zhang Q, Zhang L, Zhao  
353 Y, Liu X, Li A. 2016. Alterations of the gut microbiome of largemouth bronze  
354 gudgeon (*Coreius guichenoti*) suffering from furunculosis. *Sci Rep* 6:30606.
- 355 38. Nie L, Zhou QJ, Qiao Y, Chen J. 2017. Interplay between the gut microbiota  
356 and immune responses of ayu (*Plecoglossus altivelis*) during *Vibrio anguillarum*  
357 infection. *Fish Shellfish Immunol* 68:479-487.
- 358 39. Tran NT, Zhang J, Xiong F, Wang GT, Li WX, Wu SG. 2018. Altered gut  
359 microbiota associated with intestinal disease in grass carp (*Ctenopharyngodon*  
360 *idellus*). *World J Microbiol Biotechnol* 34:71.
- 361 40. Horz HP, Conrads G. 2010. The discussion goes on: What is the role of  
362 Euryarchaeota in humans? *Archaea* 2010:967271.
- 363 41. Gevers D, Kugathasan S, Denson LA, Vazquez-Baeza Y, Van Treuren W, Ren  
364 B, Schwager E, Knights D, Song SJ, Yassour M, Morgan XC, Kostic AD, Luo  
365 C, Gonzalez A, McDonald D, Haberman Y, Walters T, Baker S, Rosh J, Stephens

- 366 M, Heyman M, Markowitz J, Baldassano R, Griffiths A, Sylvester F, Mack D,  
367 Kim S, Crandall W, Hyams J, Huttenhower C, Knight R, Xavier RJ. 2014. The  
368 treatment-naive microbiome in new-onset Crohn's disease. *Cell Host Microbe*  
369 15:382-392.
- 370 42. Keren N, Konikoff FM, Paitan Y, Gabay G, Reshef L, Naftali T, Gophna U.  
371 2015. Interactions between the intestinal microbiota and bile acids in gallstones  
372 patients. *Environ Microbiol Rep* 7:874-80.
- 373 43. Konikoff T, Gophna U. 2016. *Oscillospira*: a Central, Enigmatic Component of  
374 the Human Gut Microbiota. *Trends Microbiol* 24:523-524.
- 375 44. Wang HP,Wang YL,Zheng YJ,LI P,Deng JK.2016. High-throughput sequencing  
376 of intestinal flora of infants with eczema. *Chinese Journal of Microecology*  
377 28(7):751-5.
- 378 45. Thomson NR, Crow MA, McGowan SJ ,Cox A, Salmond GP.2000.  
379 Biosynthesis of carbapenem antibiotic and prodigiosin pigment in *Serratia* is  
380 under quorum sensing control. *Molecular microbiology* 36(3):539-556..
- 381 46. Thomson NR, Cox A,Bycroft BW, Stewart GS, Williams P, Salmond GP. 1997.  
382 The Rap and Hor proteins of *Erwinia*, *Serratia* and *Yersinia* a novel subgroup in  
383 a growing superfamily of proteins regulating diverse physiological processes in  
384 bacterial pathogens. *Molecular microbiology* 26(3):531-544..
- 385 47. Bourassa MW, Alim I, Bultman SJ, Ratan RR. 2016. Butyrate, neuroepigenetics  
386 and the gut microbiome: Can a high fiber diet improve brain health? *Neurosci*  
387 *Lett* 625:56-63.
- 388 48. Engels C, Ruscheweyh HJ, Beerenwinkel N, Lacroix C, Schwab C. 2016. The  
389 Common Gut Microbe *Eubacterium hallii* also Contributes to Intestinal  
390 Propionate Formation. *Front Microbiol* 7:713.
- 391 49. Nakajima M, Shirokawa M, Miyakuni Y, Nakano T, Goto H. 2017. Giant  
392 Iliopsoas Abscess Caused by *Morganella Morganii*. *Am J Case Rep* 18:395-398.
- 393 50. Higgins LM, Frankel G, Douce G, Dougan G, MacDonald TT.1999. *Citrobacter*  
394 *rodentium* Infection in Mice Elicits a Mucosal Th1 Cytokine Response and  
395 Lesions Similar to Those in Murine Inflammatory Bowel Disease . *Infection and*



- 396 immunity 67(6):3031-3039.
- 397 51. Yang HT, Zou SS, Zhai LJ, Wang Y, Zhang FM, An LG, Yang GW. 2017.
- 398 Pathogen invasion changes the intestinal microbiota composition and induces
- 399 innate immune responses in the zebrafish intestine. *Fish Shellfish Immunol*
- 400 71:35-42.
- 401 52. She R, Li TT, Luo D, Li JB, Yin LY, Li H, Liu YM, Li XZ, Yan QG. 2017.
- 402 Changes in the Intestinal Microbiota of Gibel Carp (*Carassius gibelio*)
- 403 Associated with Cyprinid herpesvirus 2 (CyHV-2) Infection. *Curr Microbiol*
- 404 74:1130-1136.
- 405 53. Ding ZF, Cao MJ, Zhu XS, Xu GH, Wang RL. 2017. Changes in the gut
- 406 microbiome of the Chinese mitten crab (*Eriocheir sinensis*) in response to White
- 407 spot syndrome virus (WSSV) infection. *J Fish Dis* 40:1561-1571.
- 408
- 409
- 410
- 411
- 412
- 413
- 414
- 415
- 416
- 417
- 418

419 Figure legends

420 Fig.1

421 A and B are the frogs of the early stage of the rotten-skin disease; C and D are the later  
422 stages; E and F are the liver and gallbladder of healthy *P.spinosa*; G and H are the  
423 Lesions in the liver and gallbladder of diseased *P.spinosa*.

424 Fig.2

425 Diversity analysis of the gut microbiota *P. spinosa* between healthy and diseased groups:  
426 (A) Chao1; (B) Goods-coverage; (C) observed-species; (D) PD-whole-tree; (E)  
427 Shannon index; (F) Simpson index. The gut microbiota of *P. spinosa* was collected from  
428 approximately 0.3g samples of the hindgut of each individual. Disease, the gut  
429 microbiota from six diseased *P. spinosa*. Health, the gut microbiota from five healthy  
430 *P. spinosa*. P values show the difference between the groups.  $P>0.05$  represents the little  
431 difference between groups,  $p<0.05$  indicates the significant difference between the  
432 groups,  $p<0.01$  indicates the extremely different between the groups. Data are the  
433 mean $\pm$  SE

434 Fig.3

435 The inner circular diagram (A) shows the relative abundance of different phyla in  
436 *P.spinosa* gut samples. The gut microbiota of *P. spinosa* was collected from  
437 approximately 0.3g samples of the hindgut of each individual. D, the gut microbiota  
438 from six diseased *P. spinosa*. H, the gut microbiota from five healthy *P. spinosa*.  
439 the significant difference in phylum between health and disease groups (B) . The  
440 STAMP based on the top 10 phyla of the gut microbiota compositions analyzed the

441 significantly different( $p<0.05$ ) phylum between the groups.

442 Fig.4

443 PCA profile(A). PCA was conducted based on the all genus microbial communities  
444 showing the differentiation of the *P.spinosa* gut microbiota communities between the  
445 health and disease group. PCoA profile(B)、 and UPGMA cluster graph (C) based on  
446 the unweight unfrac distance showing the differentiation of the *P.spinosa* gut  
447 microbiota communities between each individual. The PCoA was conducted based on  
448 the all genus microbial communities. The gut microbiota of *P. spinosa* was collected  
449 from approximately 0.3g samples of the hindgut of each individual. Disease, the gut  
450 microbiota from 6 diseased *P. spinosa*. Health, the gut microbiota from 5 healthy *P.*  
451 *spinosa*.

452 Fig.5

453 LEfSe profile showing differences in healthy and diseased *P.spinosa* gut microbial  
454 communities. LEfSe analysis was conducted based on the top 40 genus compositions  
455 of the *P. spinosa* gut microbiota. The gut microbiota of *P. spinosa* was collected from  
456 approximately 0.3g samples of the hindgut of each individual. Disease, the gut  
457 microbiota from 6 diseased *P. spinosa*. Health, the gut microbiota from 5 healthy *P.*  
458 *spinosa*.

459

460

461

462

463 Table 1. Recent studies about gut microbiota between healthy and diseased samples

| Species                                                    | Disease                                          | Finding                                                                                                                                                                                               | Authors |
|------------------------------------------------------------|--------------------------------------------------|-------------------------------------------------------------------------------------------------------------------------------------------------------------------------------------------------------|---------|
| Grass carp<br>( <i>Ctenopharyngodon idellus</i> )          | Enteritis                                        | The association between changes of the gut microbiota and enteritis in grass carp                                                                                                                     | (39)    |
| Crucian Carp<br>( <i>Carassius auratus</i> )               | Red-Operculum Disease                            | The surge of some potential pathogens as bacterial signatures that were associated with “red-operculum” disease in crucian carps                                                                      | (16)    |
| largemouth bronze gudgeon<br>( <i>Coreius guichenoti</i> ) | Furunculosis                                     | The presence of healthy carriers of pathogenic <i>Aeromonas salmonicida</i> among the farmed fish, and the gut appeared as a probable infection source for furunculosis in largemouth bronze gudgeon. | (37)    |
| Ayu<br>( <i>Plecoglossus altivelis</i> )                   | <i>Vibrio anguillarum</i> infection              | <i>Vibrio anguillarum</i> infection substantially disrupted the compositions and interspecies interaction of ayu gut bacterial community.                                                             | (38)    |
| Zebrafish( <i>Barc hydanio rerio</i> var)                  | <i>Aeromonas hydrophila</i> infected             | the invasion of pathogen could change the gut microbiota composition and induce gut innate immune responses in zebrafish                                                                              | (51)    |
| Gibel Carp<br>( <i>Carassius gibelio</i> )                 | <i>Cyprinid herpesvirus 2</i> (CyHV-2) Infection | The composition was dramatically altered following CyHV-2 infection ; <i>Plesiomonas</i> was highly abundant in infected samples, and could be used as a microbial biomarker for CyHV-2 infection     | (52)    |
| Chinese mitten crab ( <i>Eriocheir sinensis</i> )          | White spot syndrome virus (WSSV) infection       | Changes in gut microbiome were closely associated with the severity of WSSV infection and that indicator taxa could be used to evaluate the crab health status.                                       | (53)    |
| Shrimp<br>( <i>Litopenaeus vannamei</i> )                  | Acute hepatopancreatic necrosis disease          | Shrimp health is highly relevant to the homeostasis of its gut bacterial community.                                                                                                                   | (35)    |

464

465

466

467

468

469

470 Figures

471 Fig.1

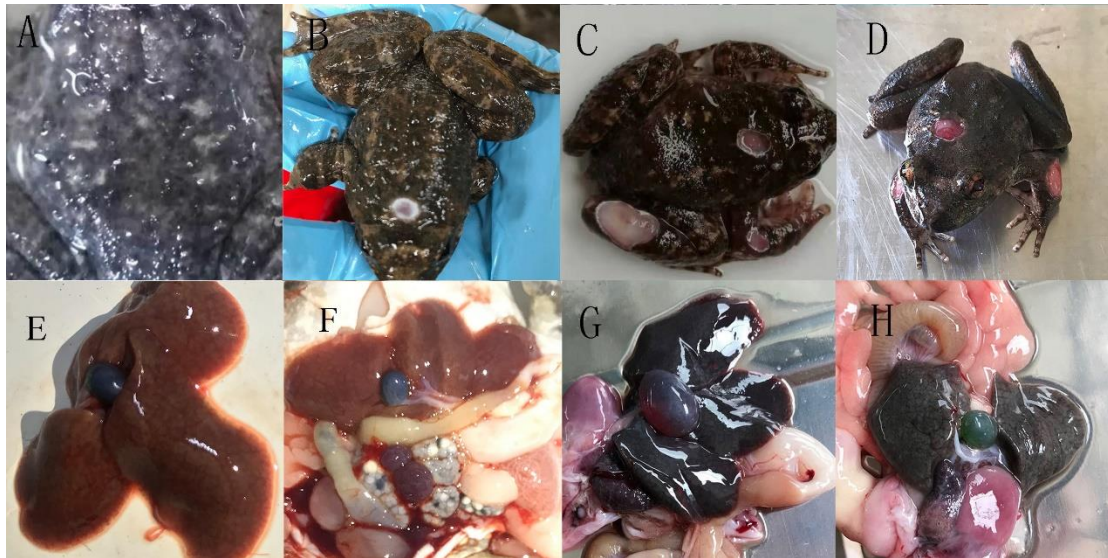

472

473

474 Fig.2

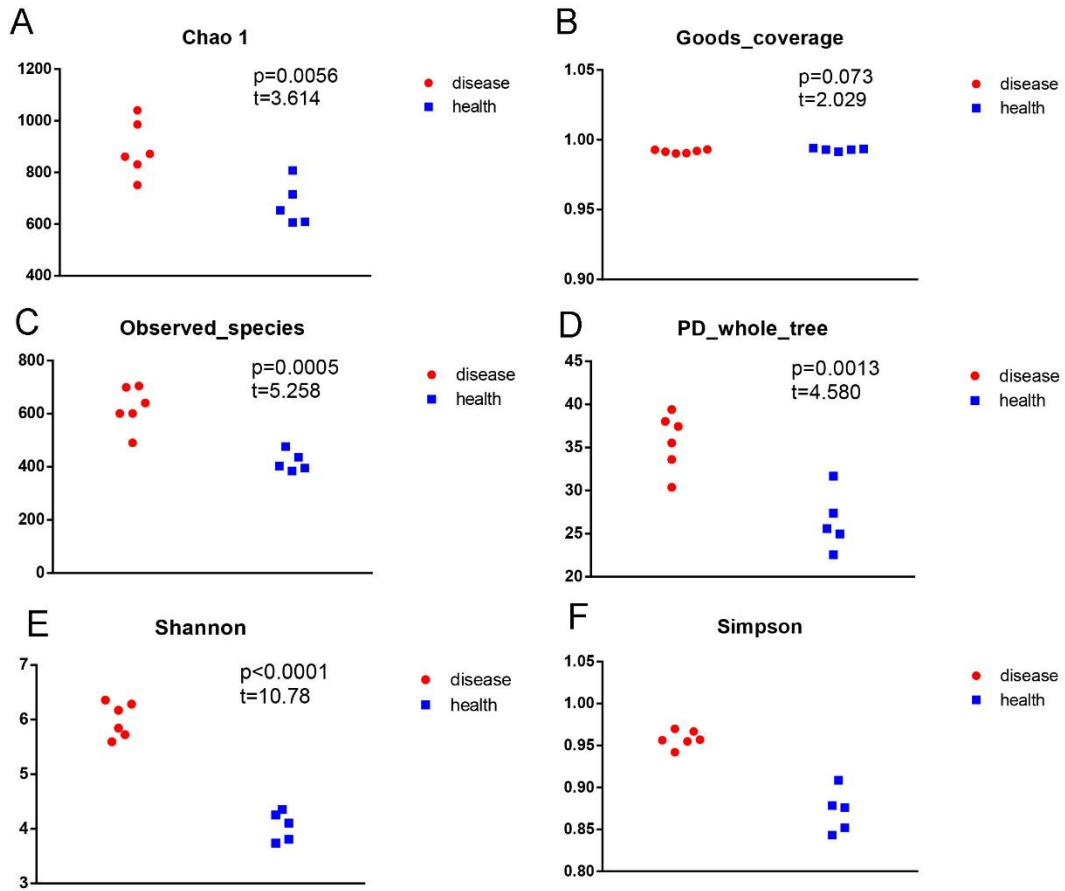

475

476

477

478

479

480

481

482

483

484

485 Fig.3

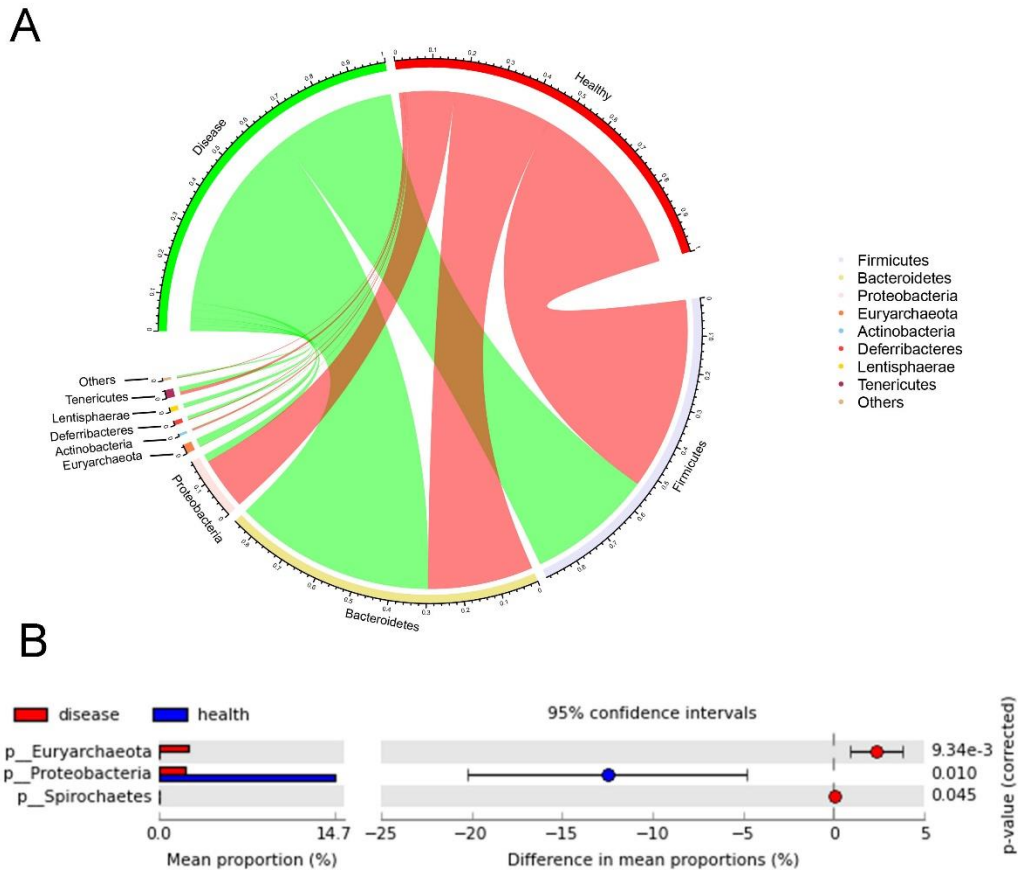

486

487

488

489

490

491

492

493

494

495

496

497 Fig.4

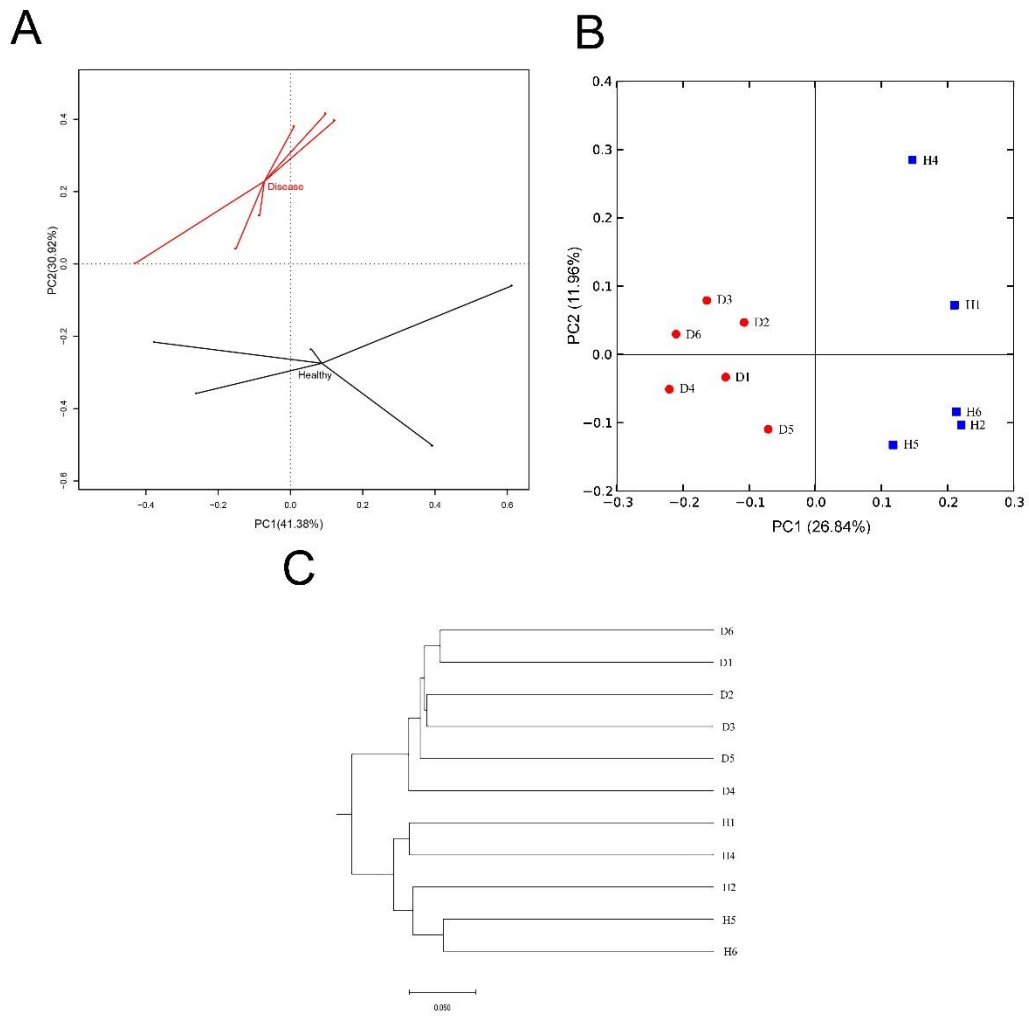

498

499

500



501 Fig.5

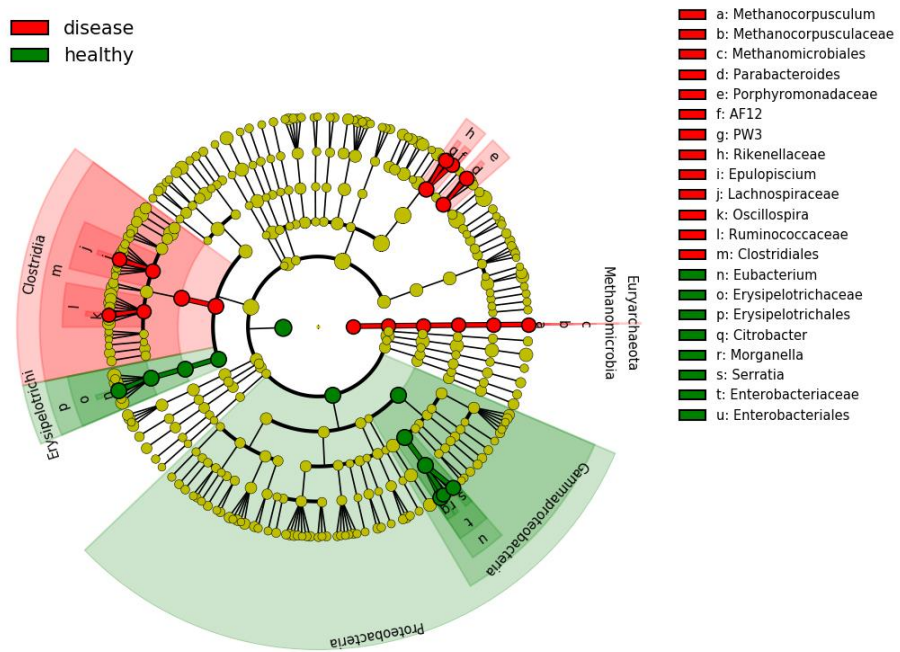

502

504

Table 1. Recent studies about gut microbiota between healthy and diseased samples

| Species                                                    | Disease                                          | Finding                                                                                                                                                                                               | Authors |
|------------------------------------------------------------|--------------------------------------------------|-------------------------------------------------------------------------------------------------------------------------------------------------------------------------------------------------------|---------|
| Grass carp<br>( <i>Ctenopharyngodon idellus</i> )          | Enteritis                                        | The association between changes of the gut microbiota and enteritis in grass carp                                                                                                                     | (39)    |
| Crucian Carp<br>( <i>Carassius auratus</i> )               | Red-Operculum Disease                            | The surge of some potential pathogens as bacterial signatures that were associated with “red-operculum” disease in crucian carps                                                                      | (16)    |
| largemouth bronze gudgeon<br>( <i>Coreius guichenoti</i> ) | Furunculosis                                     | The presence of healthy carriers of pathogenic <i>Aeromonas salmonicida</i> among the farmed fish, and the gut appeared as a probable infection source for furunculosis in largemouth bronze gudgeon. | (37)    |
| Ayu<br>( <i>Plecoglossus altivelis</i> )                   | <i>Vibrio anguillarum</i> infection              | <i>Vibrio anguillarum</i> infection substantially disrupted the compositions and interspecies interaction of ayu gut bacterial community.                                                             | (38)    |
| Zebrafish( <i>Barc hydanio rerio</i> var)                  | <i>Aeromonas hydrophila</i> infected             | the invasion of pathogen could change the gut microbiota composition and induce gut innate immune responses in zebrafish                                                                              | (51)    |
| Gibel Carp<br>( <i>Carassius gibelio</i> )                 | <i>Cyprinid herpesvirus 2</i> (CyHV-2) Infection | The composition was dramatically altered following CyHV-2 infection ; <i>Plesiomonas</i> was highly abundant in infected samples, and could be used as a microbial biomarker for CyHV-2 infection     | (52)    |
| Chinese mitten crab ( <i>Eriocheir sinensis</i> )          | White spot syndrome virus (WSSV) infection       | Changes in gut microbiome were closely associated with the severity of WSSV infection and that indicator taxa could be used to evaluate the crab health status.                                       | (53)    |
| Shrimp<br>( <i>Litopenaeus vannamei</i> )                  | Acute hepatopancreatic necrosis disease          | Shrimp health is highly relevant to the homeostasis of its gut bacterial community.                                                                                                                   | (35)    |

Figures

Fig.1

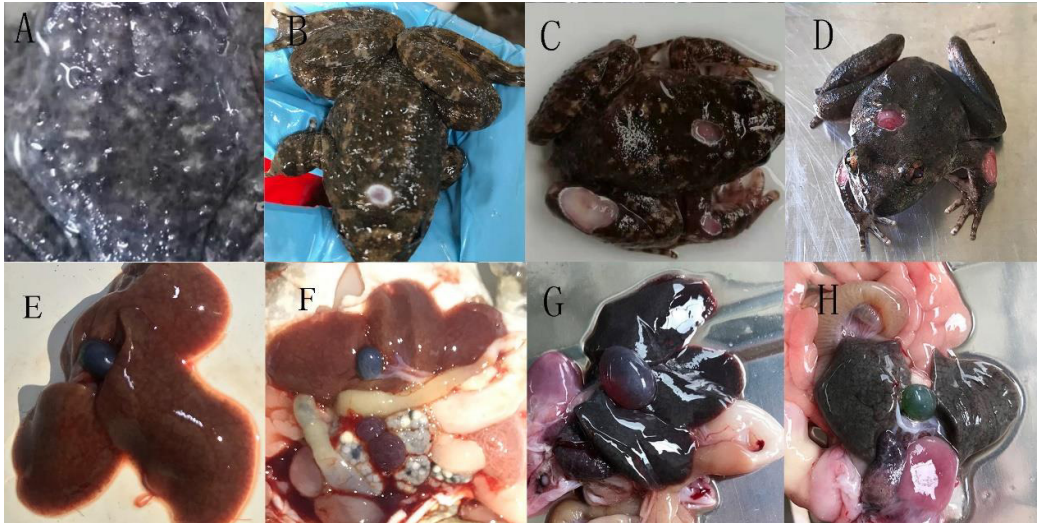

A and B are the frogs of the early stage of the rotten-skin disease; C and D are the later stages; E and F are the liver and gallbladder of healthy *P.spinosa*; G and H are the Lesions in the liver and gallbladder of diseased *P.spinosa*.

Fig.2

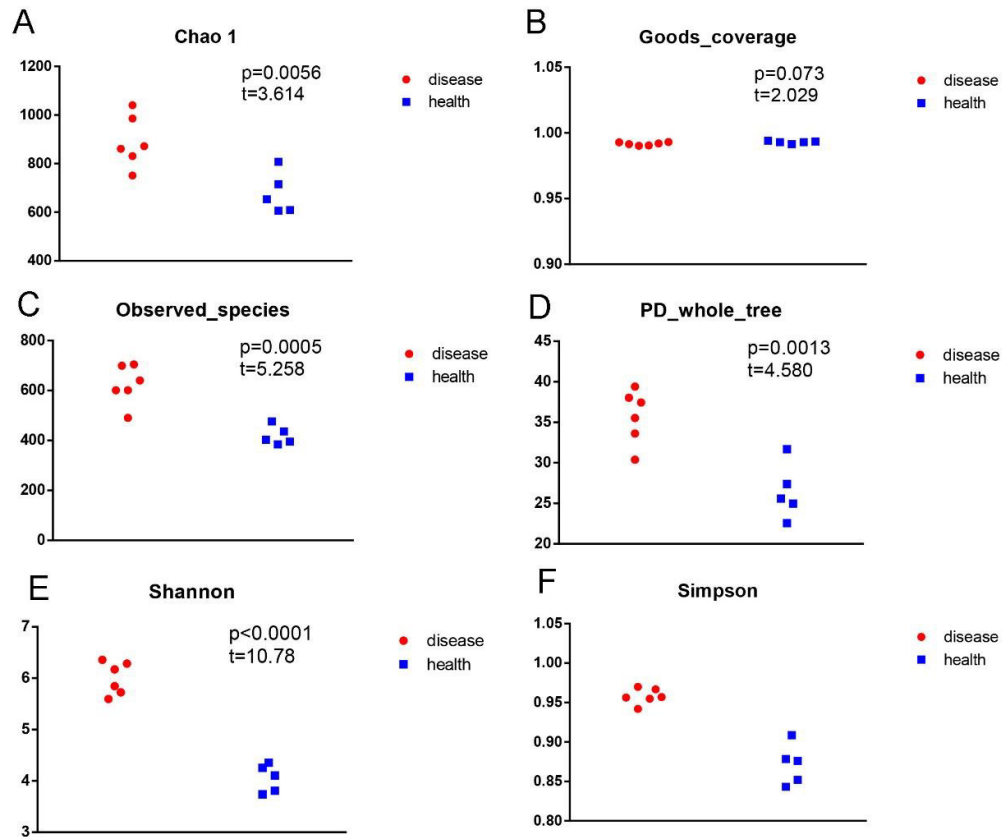

Diversity analysis of the gut microbiota *P. spinosa* between healthy and diseased groups: (A) Chao1; (B) Goods-coverage; (C) observed-species; (D) PD-whole-tree; (E) Shannon index; (F) Simpson index. The gut microbiota of *P. spinosa* was collected from approximately 0.3g samples of the hindgut of each individual. Disease, the gut microbiota from six diseased *P. spinosa*. Health, the gut microbiota from five healthy *P. spinosa*. P values show the difference between the groups.  $P>0.05$  represents the little difference between groups,  $p<0.05$  indicates the significant difference between the groups,  $p<0.01$  indicates the extremely different between the groups. Data are the  $\text{mean} \pm \text{SE}$

Fig.3

A

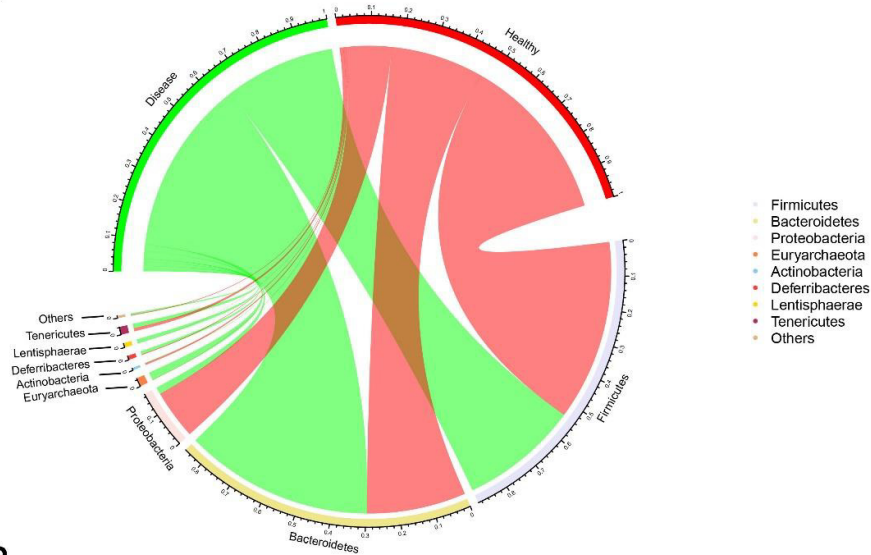

B

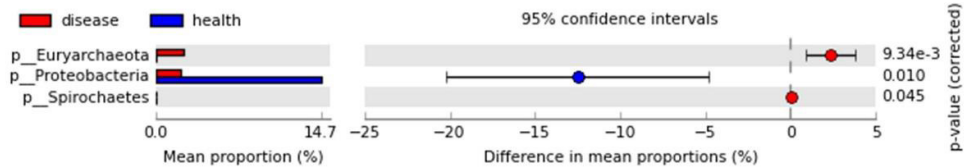

The inner circular(A) diagram shows the relative abundance of different phyla in *P. spinosa* gut samples. The gut microbiota of *P. spinosa* was collected from approximately 0.3g samples of the hindgut of each individual. D, the gut microbiota from six diseased *P. spinosa*. H, the gut microbiota from five healthy *P. spinosa*. The significant difference in phylum between health and disease groups(B). The STAMP based on the top 10 phyla of the gut microbiota compositions analyzed the significantly different( $p < 0.05$ ) phylum between the groups.

Fig.4

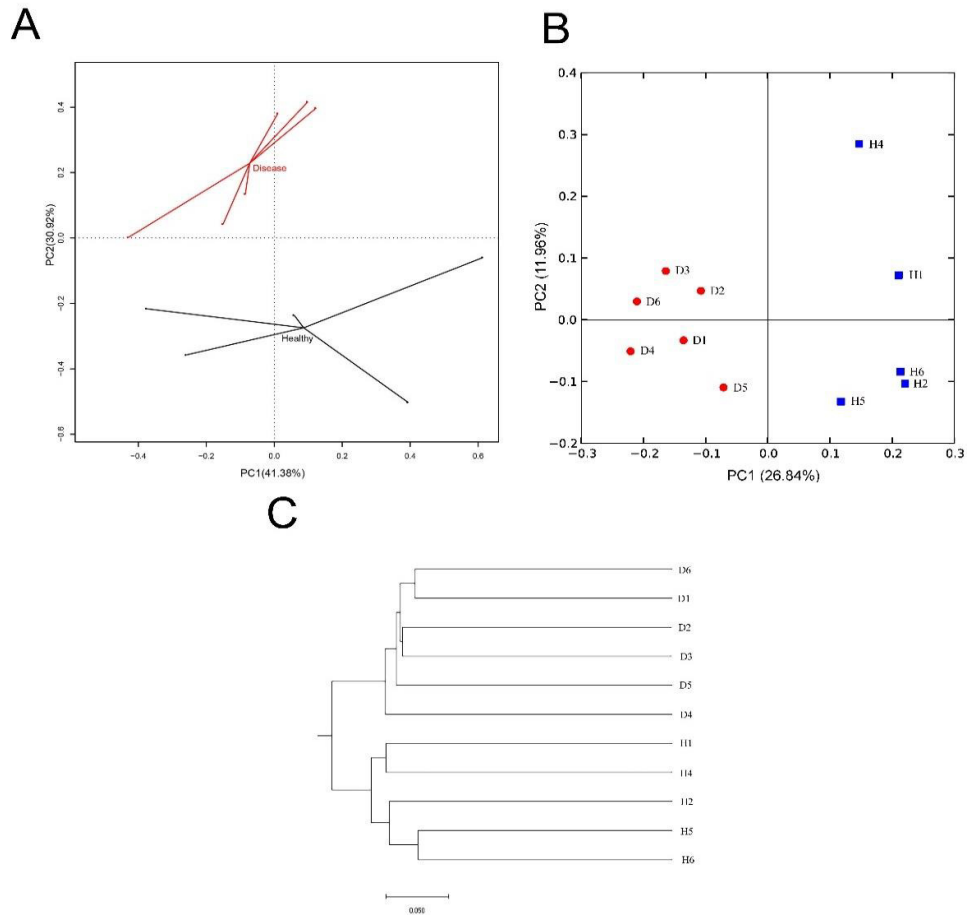

PCA profile(A). PCA was conducted based on the all genus microbial communities showing the differentiation of the *P.spinosa* gut microbiota communities between the health and disease group. PCoA profile(B)and UPGMA cluster graph (C) based on the unweight unifrac distance showing the differentiation of the *P.spinosa* gut microbiota communities between each individual. The PCoA was conducted based on the all genus microbial communities. The gut microbiota of *P. spinosa* was collected from approximately 0.3g samples of the hindgut of each individual. Disease, the gut microbiota from 6 diseased *P. spinosa*. Health, the gut microbiota from 5 healthy *P.*

*spinosa.*

Fig.5

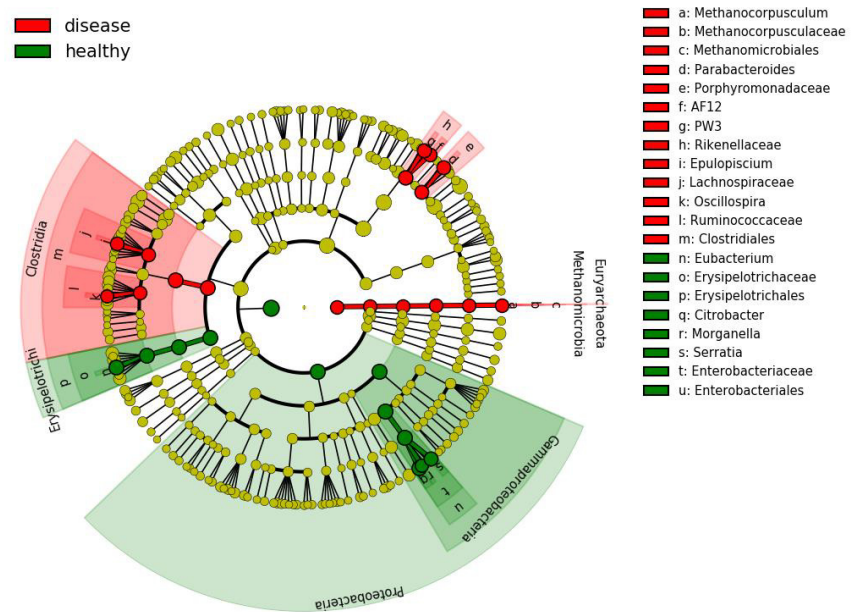

LefSe profiles showing differences in healthy and diseased *P. spinosa* gut microbial communities. LefSe analysis was conducted based on the top 40 genus compositions of the *P. spinosa* gut microbiota. The gut microbiota of *P. spinosa* was collected from approximately 0.3g samples of the hindgut of each individual. Disease, the gut microbiota from 6 diseased *P. spinosa*. Health, the gut microbiota from 5 healthy *P. spinosa*.
